# Supplementary material for: Graphene oxide as a catalyst for the diastereoselective transfer hydrogenation in the synthesis of prostaglandin derivatives
Source: Royal Society of Chemistry journal article supplement (doi:10.1039/c7cc05105k), 2017-01-01
Supplement: c7cc05105k1.pdf [file c7cc05105k1.pdf]

SUPPLEMENTARY INFORMATION

**Graphene oxide as catalyst for the diastereoselective transfer hydrogenation in the synthesis of prostaglandin derivatives**

Simona M. Coman,<sup>a</sup> Iunia Podolean,<sup>a</sup> Madalina Tudorache,<sup>a</sup> Bogdan Cojocaru,<sup>a</sup> Vasile I. Parvulescu<sup>a</sup>, Marta Puche,<sup>b</sup> Hermenegildo Garcia<sup>b</sup>

Preparation of GO.

GO has been obtained starting from graphite by conventional Hummers oxidation to graphite oxide, followed by exfoliation by ultrasounds.<sup>33</sup> In brief, graphite flakes (3 g) were suspended in a mixture of concentrated H<sub>2</sub>SO<sub>4</sub>/H<sub>3</sub>PO<sub>4</sub> (360:40 ml). To this mixture, KMnO<sub>4</sub> (18 g) was added by producing an exothermic reaction raising the temperature to 35–40 °C. This reaction mixture was then heated to 50 °C under stirring for 12 h. The reaction was cooled to room temperature and poured into 400 g of ice containing 30 % H<sub>2</sub>O<sub>2</sub> (3 ml). After allowing the suspension to cool at the air, the mixture was filtered, washed with 1:10 HCl (37%) solution and then further washed with additional water. The remaining solid was sonicated in 400 ml of water for 30 min and centrifuged at 4,000 r.p.m. for 4 h. The supernatant was again centrifuged at 15,000 r.p.m. for 1 h. The solid obtained, after centrifugation at 15,000 r.p.m., was dried at 60 °C.

NH<sub>3</sub>-TPD measurement was performed using an AutoChem II 2920 station from Micromeritics. Before NH<sub>3</sub> adsorption, the fresh sample was heated to 120°C (20°C min<sup>-1</sup>) in 30 mL high pure He flow. Subsequently, the sample was cooled down to RT in He flow. NH<sub>3</sub> adsorption was performed under ambient conditions for 120 min in a flow of 10% ammonia in He (30 mL.min<sup>-1</sup>). Then, the samples were purged with He to allow the physisorption of ammonia to be evacuated. Desorption of NH<sub>3</sub> was carried out with the linear heating rate (10°C min<sup>-1</sup>) in a flow of He till 500°C.

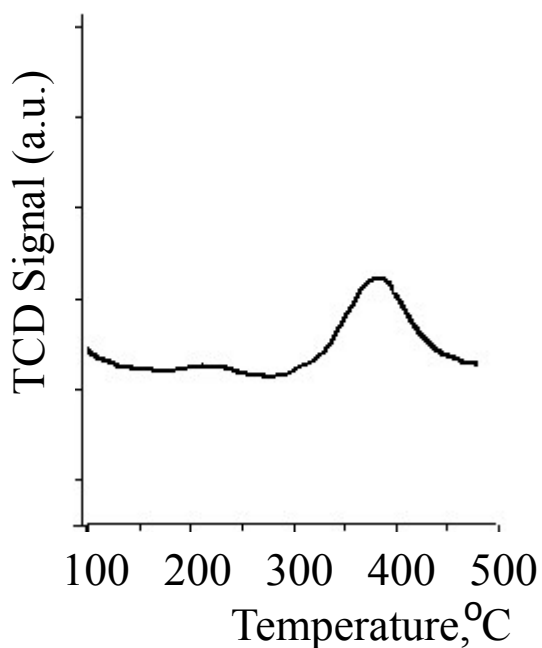

Figure SI 1. NH<sub>3</sub>-TPD of GO

The NH<sub>3</sub>-TPD measurements of the GO evidenced the presence of two desorption peaks: a low intensity peak at 230°C and a high intensity peak at 380°C indicating the presence of acidic sites preponderantly of high strength.

### **Acknowledgements**

The authors are grateful to Dr. F. Cocu who took care on the synthesis of all investigated organic substrates. V.I.P thanks Romanian UEFIDISCI (project PN-III-P4-ID-PCE-2016-0146) for funding. Partial funding by the Spanish Ministry of Economy and Competitiveness (Severo Ochoa and CTQ2015-69543-CO2-R1) is acknowledged.
